# Supplementary material for: Functional outcomes from a head-to-head, randomized, double-blind trial of lisdexamfetamine dimesylate and atomoxetine in children and adolescents with attention-deficit/hyperactivity disorder and an inadequate response to methylphenidate
Source: Springer Nature journal article supplement (doi:10.1007/s00787-015-0718-0), 2015-05-21

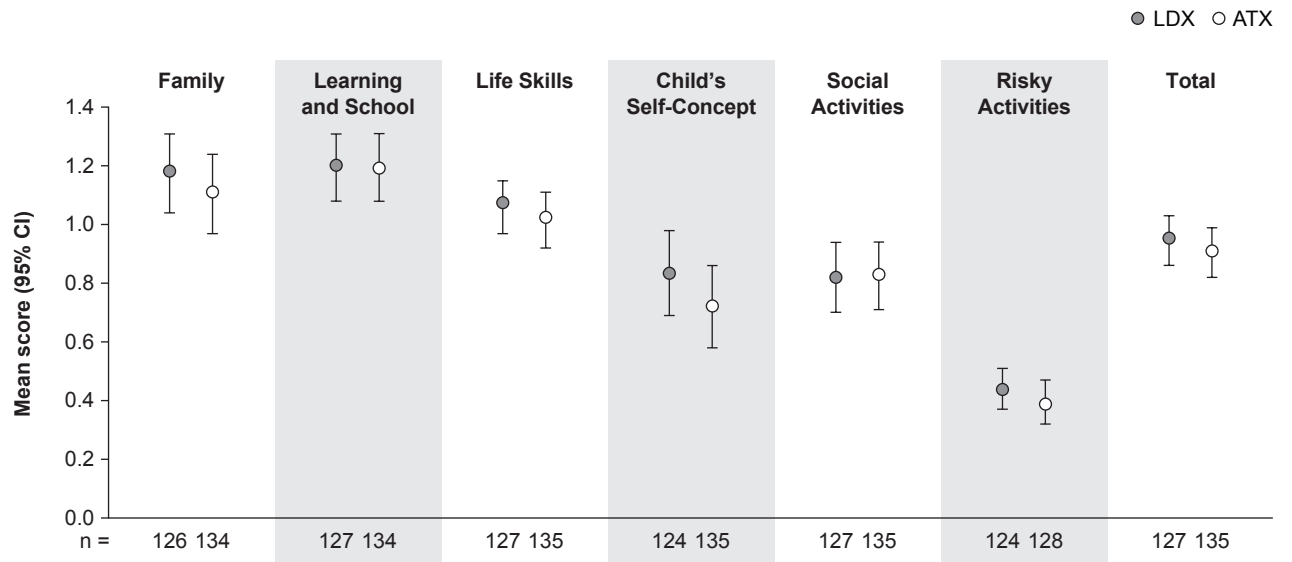

Supplement: MOESM1 [file 8685356]
